# Supplementary material for: Voxel-wise comparisons of cellular microstructure and diffusion-MRI in mouse hippocampus using 3D Bridging of Optically-clear histology with Neuroimaging Data (3D-BOND)
Source: PubMed Central journal article supplement (PMC5838167; doi:10.1038/s41598-018-22295-9), 2018-03-05
Supplement: 41598_2018_22295_MOESM1_ESM.pdf [file 41598_2018_22295_MOESM1_ESM.pdf]

# Voxel-wise comparisons of cellular microstructure and diffusion-MRI in mouse hippocampus using 3D Bridging of Optically-clear histology with Neuroimaging Data (3D-BOND)

Stolp HB<sup>1</sup>, Ball G<sup>1,3</sup>, So P-W<sup>2</sup>, Tournier, J-D<sup>1</sup>, Jones M<sup>1</sup>, Thornton C<sup>1\*</sup>, Edwards AD<sup>1</sup>

<sup>1</sup>Centre for the Developing Brain, Division of Imaging Sciences and Biomedical Engineering, St Thomas' Hospital, King's College London, London SE1 7EH, United Kingdom

<sup>2</sup>Department of Neuroimaging, Maurice Wohl Clinical Neuroscience Institute, Institute of Psychiatry, Psychology and Neuroscience, King's College London, London SE5 9NU, United Kingdom

<sup>3</sup>Developmental Imaging, Clinical Sciences, Murdoch Children's Research Institute, Melbourne 3052, Australia

Author email addresses: [helen.stolp@kcl.ac.uk](mailto:helen.stolp@kcl.ac.uk); [gareth.ball@mcri.edu.au](mailto:gareth.ball@mcri.edu.au); [po-wah.so@kcl.ac.uk](mailto:po-wah.so@kcl.ac.uk); [jacques\\_donald.tournier@kcl.ac.uk](mailto:jacques_donald.tournier@kcl.ac.uk), [marc.jones@kcl.ac.uk](mailto:marc.jones@kcl.ac.uk); [claire.thornton@kcl.ac.uk](mailto:claire.thornton@kcl.ac.uk); [ad.edwards@kcl.ac.uk](mailto:ad.edwards@kcl.ac.uk);

Corresponding Author:

\*C. Thornton

Centre the Developing Brain

1<sup>st</sup> Floor, South Wing, St Thomas' Hospital

London SE1 7EH, United Kingdom

Email: [claire.thornton@kcl.ac.uk](mailto:claire.thornton@kcl.ac.uk)

Phone: +44 (0) 20 7188 7118 x54387

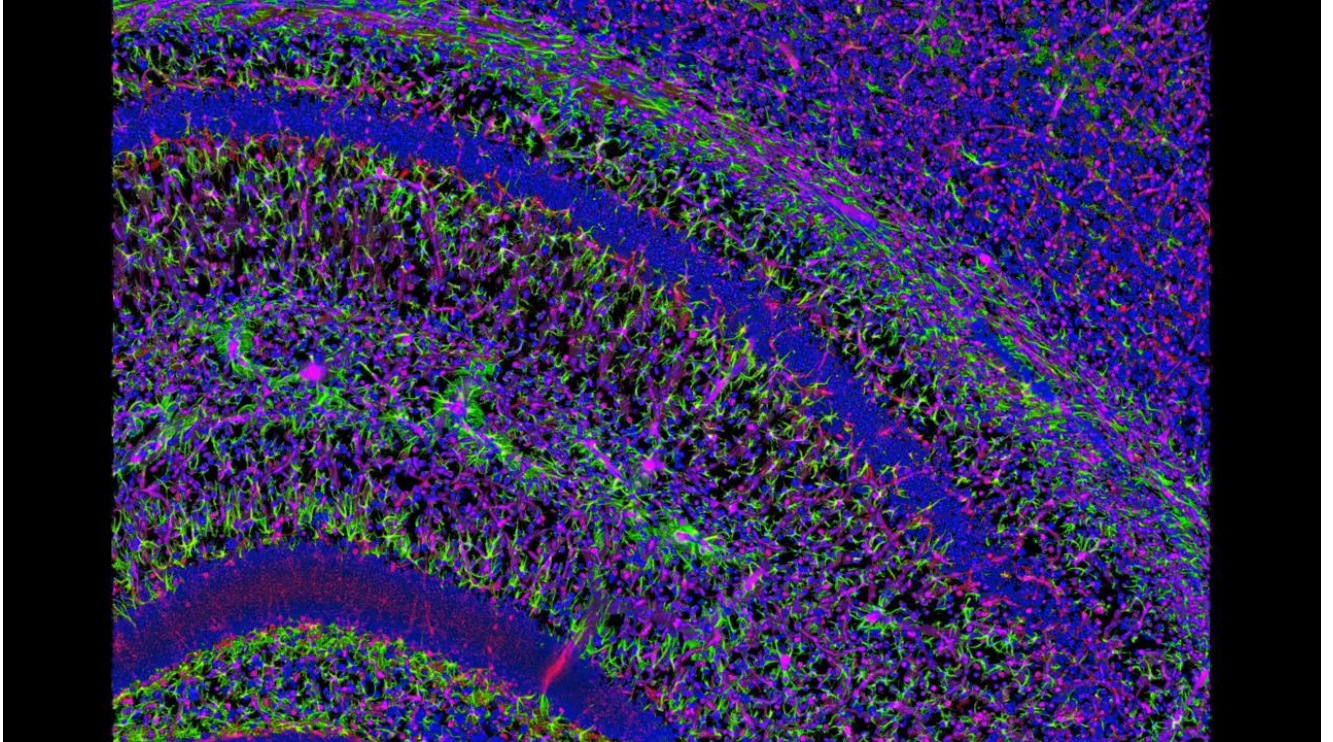

**Suppl. Figure 1. 3D representation of microstructure in the hippocampus.** Movie of GFAP-positive astrocytes (green), lectin-positive blood vessels (pink) and DAPI-positive cell nuclei (blue) in the hippocampus at a  $1\mu\text{m}^3$  voxel resolution.

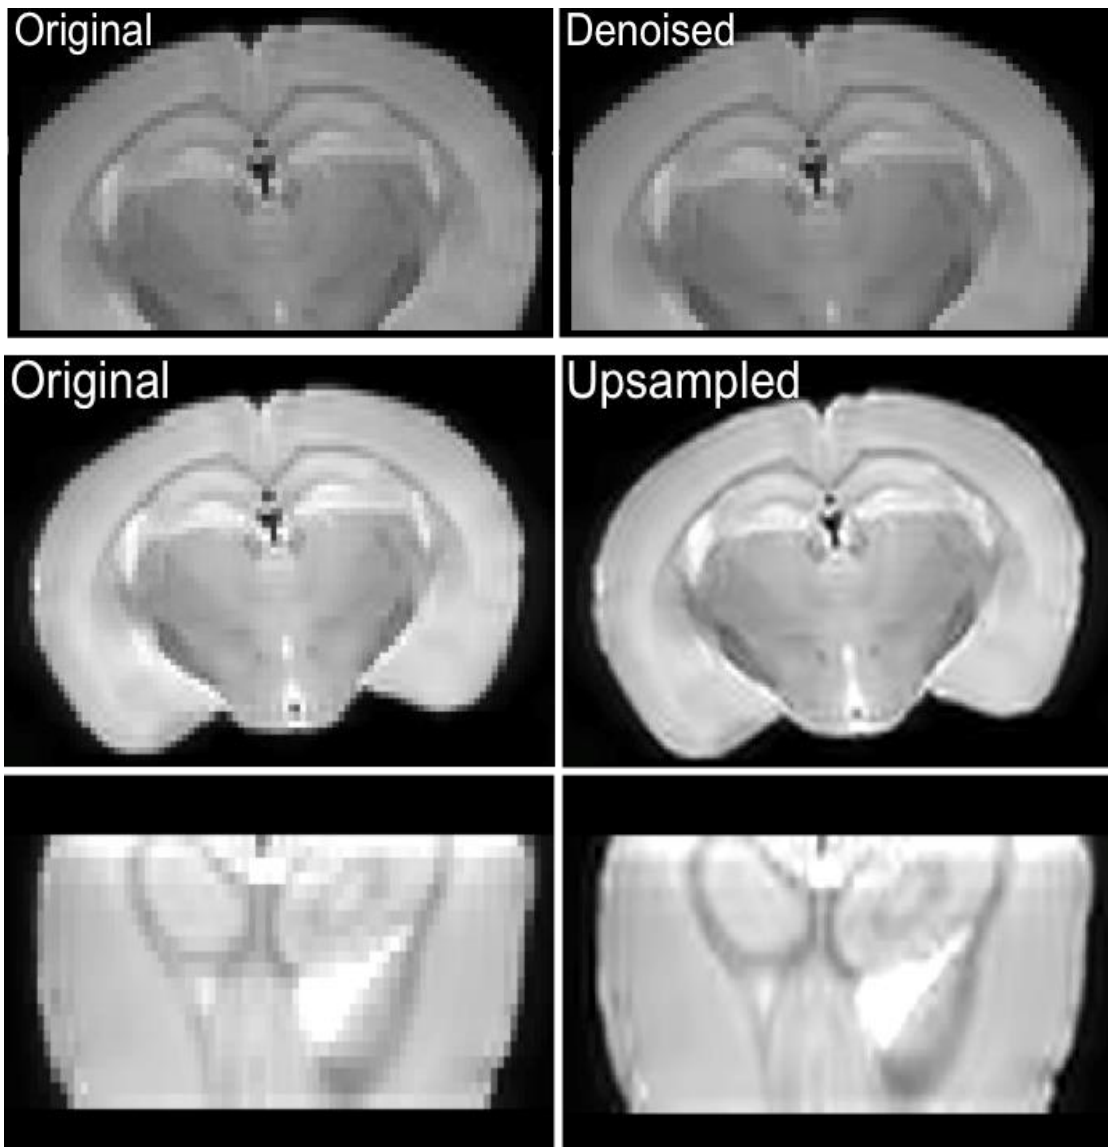

**Suppl. Figure 2. MRI processing.** For registration, averaged B0 images were denoised and upsampled to improve landmark identification.

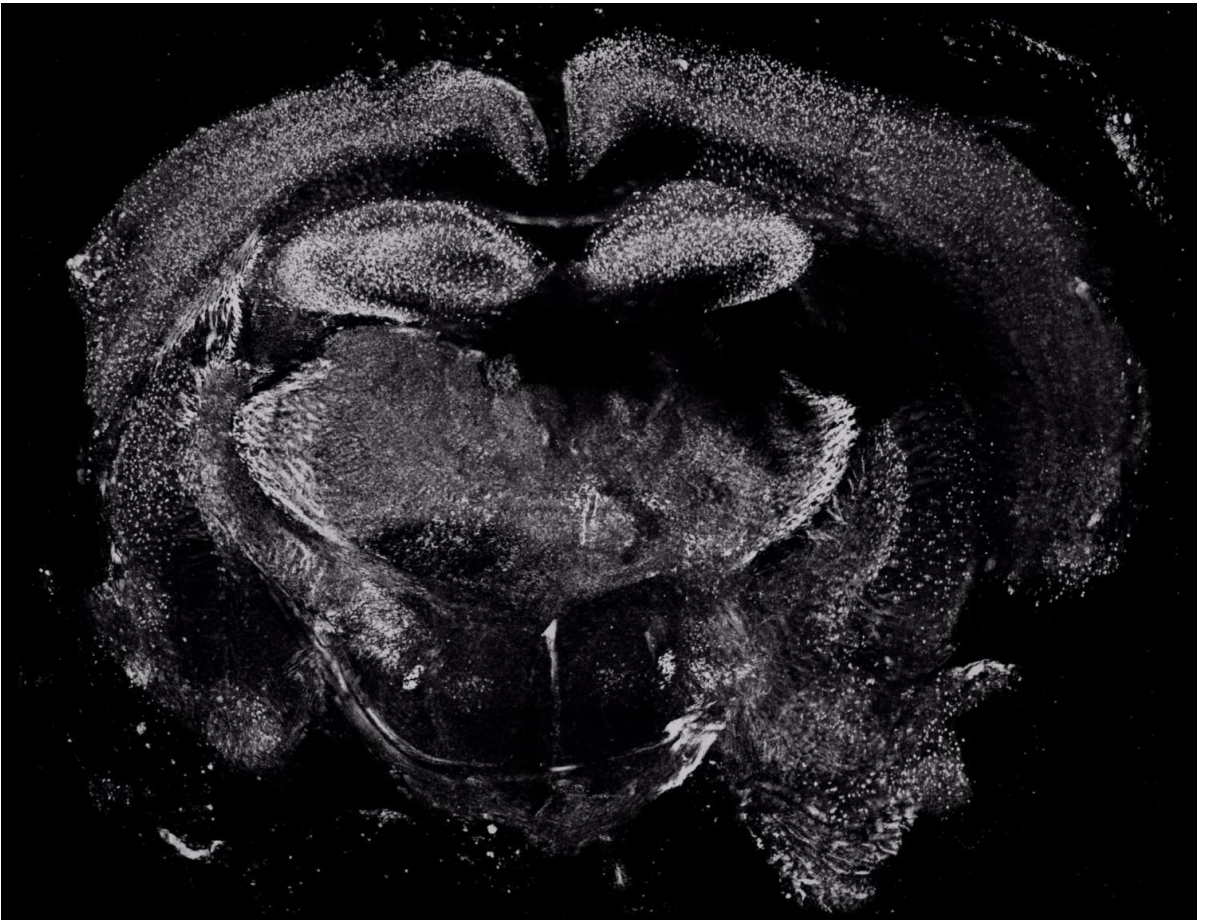

**Suppl. Figure 3. 3D hippocampal structure.** 3D projection of parvalbumin-positive interneurons in a 0.6mm tissue slice, from optically-clear tissue; the 3D structure of the hippocampus is clearly demonstrated. Scale bar = 1mm.



**A** Registration Overlay – MRI and CLARITY

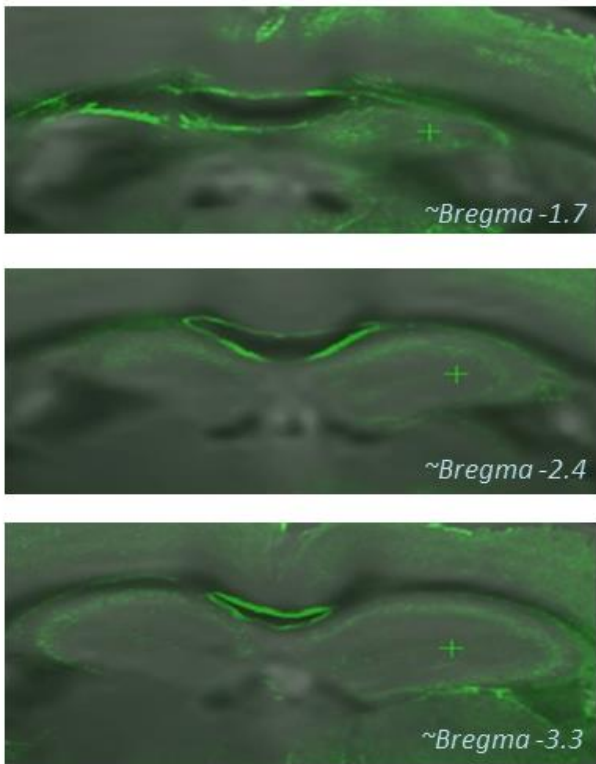

**B** Registration Overlay – MRI and AMBMC atlas

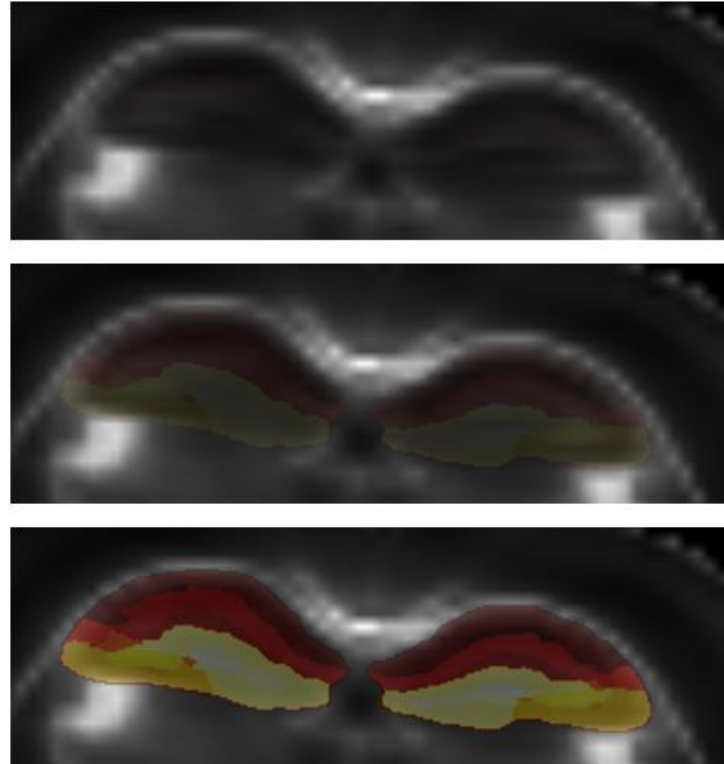

**Suppl. Figure 4. Image processing and registration.** A) Overlay of registered MRI (grey) and confocal (green) images at a number of rostro-caudal positions shows registration of the hippocampus. B) Overlay of hippocampal subregion mask from AMBMC atlas (colour) on FA map (grey), with varying transparency of the overlay to show the registration alignment between the two datasets.

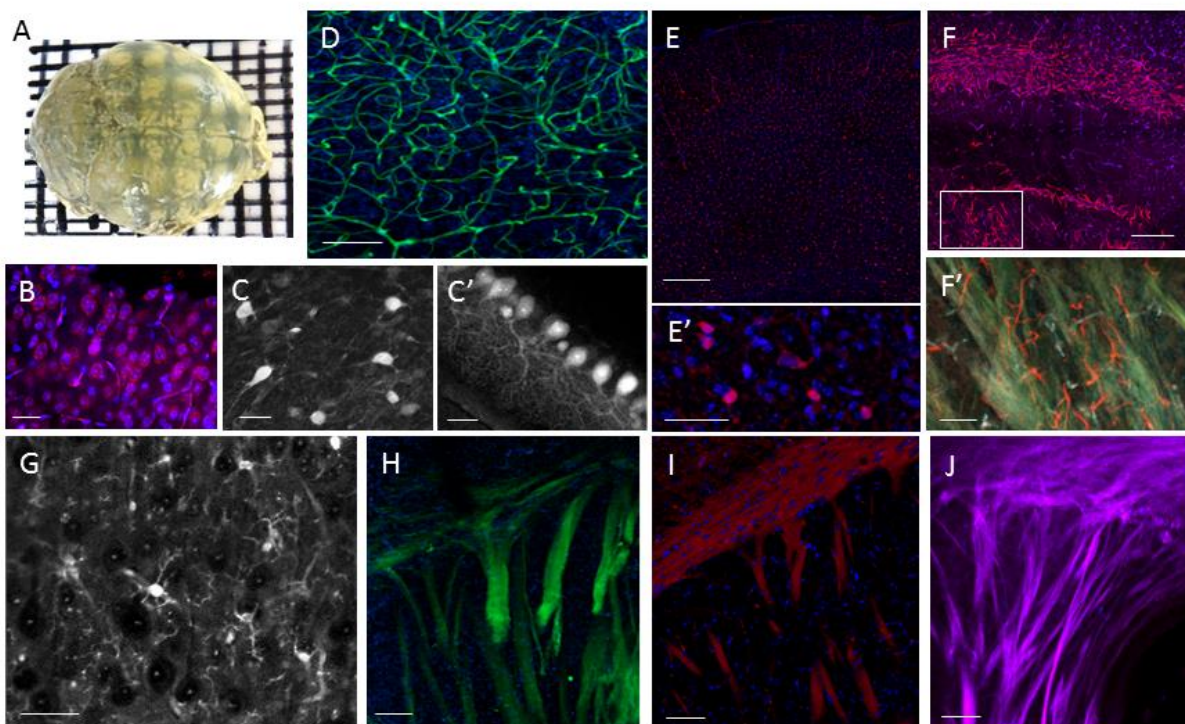

**Suppl. Figure 5. Immunohistochemical visualisation of cellular microstructure in optically-clear tissue.** Brain tissue was processed until optically-clear (A) and stained using modified immunohistochemistry. Neurons are recognised with NeuN (B) or the interneuron marker, parvalbumin (C - cortex, C' - cerebellum). Blood vessels can be detected using biotinylated Tomato lectin (D). Astrocytes can be identified throughout the brain using S100b (depicted in the cortex in E, higher magnification in E'), or in the white matter tracts and in association with blood vessels using GFAP (F and F'). Microglia stained with Iba1 (G). White matter tracts can be identified with myelin markers (PLP and CNPase respectively, H, I), or neurofilament (J). Scale bar: E, F = 200µm; D, H, I, J = 100µm; B, C, C', E', F', G = 50µm.

Supplementary Table 1. Registration landmarks

| Landmark no. | lateralisation | Bregma co-ordinate | Region description                                                                                                                | Graphical representation                                                              |
|--------------|----------------|--------------------|-----------------------------------------------------------------------------------------------------------------------------------|---------------------------------------------------------------------------------------|
| 1            | L &/or R       | -1.80mm            | Centre of the CA3 region of the hippocampus, when only the very first portion of the hippocampus and dentate gyrus are visible    |      |
| 2            | Midline        | -1.80mm            | Border between dentate gyri and third ventricle in same section                                                                   |      |
| 3            | L &/or R       | -3.30mm            | Dorsal border of CA1 hippocampus, directly under peak of cingulum                                                                 |      |
| 4            | L &/or R       | -3.30mm            | Dorsolateral border of hippocampus near external capsule, at CA2                                                                  |     |
| 5            | L &/or R       | -3.30mm            | Lateral boundary of CA2/3 region of the hippocampus, the fimbria hippocampus and lateral ventricle                                |    |
| 6            | L &/or R       | -3.30mm            | Medial boundary of fimbria hippocampus where it joins the CA3 region of the hippocampus, near the lateral dorsal thalamic nucleus |    |
| 7            | L &/or R       | -3.30mm            | Sulci between CA3 and blade of DG, between lateral posterior and lateral dorsal thalamic nuclei                                   |    |
| 8            | L &/or R       | -3.30mm            | Point of DG, between lateral posterior thalamic nucleus and habenular nucleus                                                     |    |
| 9            | Midline        | -3.30mm            | Hippocampal bridge between hemispheres at top of third ventricle                                                                  |    |
| 10           | L &/or R       | -3.30mm            | Middle of hippocampus, on the hippocampal fissure immediately above the peak of the DG.                                           |    |
| 11           | L &/or R       | -4.30mm            | Dorsal border of CA1 hippocampus, directly under peak of cingulum                                                                 |    |
| 12           | L &/or R       | -4.30mm            | Dorsolateral border of hippocampus near external capsule, at CA2                                                                  |    |
| 13           | L &/or R       | -4.30mm            | Mid-point of fimbria hippocampus, between dorsal and ventral CA3 hippocampal region                                               |   |
| 14           | L &/or R       | -4.30mm            | Dorsal endopiriform nucleus, at base of external capsule                                                                          |  |
| 15           | L &/or R       | -4.30mm            | Optic tract at lateral flexion of thalamus                                                                                        |  |
| 16           | L &/or R       | -4.30mm            | Sulci between CA3 and blade of DG, between DLG and lateral posterior thalamic nucleus                                             |  |
| 17           | L &/or R       | -4.30mm            | Sulci between CA1 and DG, above pretectal nucleus                                                                                 |  |
| 18           | Midline        | -4.30mm            | Hippocampal bridge between hemispheres at top of third ventricle                                                                  |  |
| 19           | L &/or R       | -4.30mm            | Middle of hippocampus, on the hippocampal fissure immediately above the peak of the DG.                                           |  |

Supplementary Table 2. Details of registered tissue samples

| Sample number | Position (relative to Bregma) | Landmarks (number) | Root mean square (RMS) distance (mm) |
|---------------|-------------------------------|--------------------|--------------------------------------|
| 1, slice 1    | -2.1mm to -2.8mm              | 37                 | 0.134                                |
| 1, slice 2    | -2.8mm to -3.6mm              | 30                 | 0.174                                |
| 2, slice 1    | -1.6mm to -2.9mm              | 32                 | 0.196                                |
|               |                               |                    | 0.168 ± 0.031                        |



Supplementary Table 3. Antibodies tested in CLARITY-processed tissue

| Antibody/stain       | Species    | Cell /structure recognised | Dilution | Supplier and catalogue number |           | Staining success |
|----------------------|------------|----------------------------|----------|-------------------------------|-----------|------------------|
| NeuN                 | Guinea Pig | Neuron                     | 1:400    | Millipore                     | ABN90P    | Yes              |
| MAP1B                | Mouse      | Neuron                     | 1:200    | Abcam                         | ab3095    | No               |
| MAP2                 | Rabbit     | Neuron                     | 1:200    | Abcam                         | ab32454   | No               |
| Parvalbumin          | Rabbit     | Interneurons               | 1:400    | Abcam                         | ab11427   | Yes              |
| Calretinin           | Mouse      | Interneurons               | 1:100    | Millipore                     | MAB1568   | No               |
| GAD <sub>67</sub>    | Mouse      | interneurons               | 1:100    | Millipore                     | MAB5406   | No               |
| Iba1                 | Rabbit     | Microglia                  | 1:200    | Wako                          | 019-19741 | Yes              |
| Cx3cr1               | Rabbit     | Microglia                  | 1:200    | Abcam                         | ab8021    | No               |
| F4/80                | Rat        | Microglia                  | 1:200    | Abcam                         | ab6640    | No               |
| Tomato lectin        | N/A        | Blood vessels              | 1:400    | Vector                        | B-1175    | Yes              |
| GFAP                 | Goat       | Astrocytes                 | 1:400    | Abcam                         | ab53554   | Yes              |
| S100b                | Rabbit     | Astrocytes                 | 1:400    | DAKO                          | Z0311     | Yes              |
| Glutamine Synthetase | Rabbit     | Astrocytes                 | 1:200    | Sigma                         | G2781     | No               |
| Olig2                | Rabbit     | Oligodendrocytes           | 1:200    | Millipore                     | AB9610    | Yes              |
| PLP                  | Mouse      | Myelin                     | 1:100    | Millipore                     | MAB388    | Yes              |
| CNPase               | Mouse      | Myelin                     | 1:100    | NeoMarkers                    | MS_349_P  | Yes              |
| Neurofilament        | Chicken    | Axons                      | 1:400    | Millipore                     | AB5539    | Yes              |
| NeuroTrace           | N/A        | Neuron                     | 1:50     | Molecular Probes              | N21482    | Yes              |

## Supplementary results

In CLARITY-processed, optically cleared tissue (Suppl. Figure 5A), immunohistochemistry was used to detect a number of cellular populations. Neurons could be distinctly recognised with NeuN antibody (Suppl. Figure 5B) and NeuroTrace561 dye, but not with microtubule associated protein (MAP)1b and MAP2. Interneuron populations could be robustly detected with anti-parvalbumin antibodies (Suppl. Figure 5C, 5C'), but not with calretinin or glutamate decarboxylase 1 (GAD<sub>67</sub>). Tomato lectin delineated blood vessels in CLARITY-treated tissue (Suppl. Figure 5D), but did not recognise microglia. Cortical and white matter astrocytes could be identified with S100b (though typically with less than 200µm penetration depth in the CLARITY-treated tissue, Suppl. Figure 5E, 5E'), but not antibodies against glutamine synthetase. Glial fibrillary acid protein (GFAP) consistently stained fibrous astrocytes within the white matter and hippocampus (Suppl. Figure 5F, 5F'). Resting and activated microglia were visible ubiquitously through the brain with an antibody against Iba1 (Suppl. Figure 5G), but not F4/80, Cx3cr1 or CD11b. The cell bodies of oligodendrocytes were identified by the oligodendrocyte transcription factor, Olig2 (data not shown), while myelinated fibres were stained with antibodies against proteolipid protein (PLP, Suppl. Figure 5H) and 2',3'-cyclic-nucleotide 3'-phosphodiesterase (CNPase; Suppl. Figure 5I). Axons within the white matter tracts were recognised by the cytoskeletal protein, neurofilament (NF, Suppl. Figure 5J).
